# Supplementary material for: Description of Weak Halogen Bonding Using Various Levels of Symmetry-Adapted Perturbation Theory Combined with Effective Core Potentials
Source: Hindawi journal article supplement (doi:10.1155/2017/9031494), 2017-01-01
Supplement: f1 [file 9031494.f1.doc]

**Supplementary Material**

for

Description of weak halogen bonding using various levels of symmetry-adapted perturbation theory combined with effective core potentials

by

Piotr Matczak

Department of Theoretical and Structural Chemistry, Faculty of Chemistry, University of Łódź, Pomorska 163/165, 90-236 Lodz, Poland

|  |  |  |
| --- | --- | --- |

**Supplementary Section 1**. Further details of the SAPT(DFT) calculations of the interaction energy between MH3X and HCN

The Fermi-Amaldi asymptotic correction was used in the SAPT(DFT) calculations. The ionization potentials needed for the asymptotic correction can be taken from either experiment or separate quantum-chemical calculations. Experimental vertical ionization potentials are available for CH3I, SiH3I and HCN (see Supplementary Table 1). For the remaining molecules, their vertical ionization potentials were calculated. The structures of these molecules were optimized at the MP2/def2-QZVPP level of theory, and the total energies of neutral molecules and their cationic forms were obtained from PBE0/aug-cc-pVTZ. The cations were assumed to show the same geometries as the corresponding neutral molecules. The difference in the total energies of neutral and cationic molecules yields the vertical ionization energy.

The local-density approximation was used in the time-dependent DFT kernel for all SAPT(DFT) calculations. All SAPT(DFT) calculations were performed without density fitting.

The SAPT(DFT) calculations were also repeated using an independent implementation of SAPT(DFT) in the MOLPRO 2012.1 program. The results obtained from SAPT2012.2 were not successfully reproduced by MOLPRO 2012.1. The reason seems to be more fundamental than simply a difference in asymptotic corrections available in these two programs (the Grüning et al. [S1] asymptotic correction was used in MOLPRO).

**Supplementary Table 1.** Vertical ionization potentials of MH3X and HCN (VIP; in a.u.)

| Molecule | VIP | Experimental/Calculated |
| --- | --- | --- |
| CH3I | 0.3502 | Exptl. Ref. [S2] |
| SiH3I | 0.3594 | Exptl. Ref. [S3] |
| GeH3I | 0.3597 | Calcd. |
| SnH3I | 0.3559 | Calcd. |
| PbH3I | 0.3468 | Calcd. |
| CH3At | 0.3403 | Calcd. |
| SiH3At | 0.3499 | Calcd. |
| GeH3At | 0.3446 | Calcd. |
| SnH3At | 0.3419 | Calcd. |
| PbH3At | 0.3339 | Calcd. |
| HCN | 0.5002 | Exptl. Ref. [S4] |

**Supplementary Section 2**. Comparison of SAPT/SAPT(DFT) calculations involving ECPs versus the corresponding all-electron SAPT/SAPT(DFT) results

Test calculations were performed for CH3Br···NCH and CH3I···NCH in order to inspect whether the implementation of SAPT and SAPT(DFT) in the SAPT2012.2 program is able to correctly include ECPs in SAPT/SAPT(DFT) calculations. With this end in view, both all-electron and ECP-based SAPT/SAPT(DFT) calculations were carried out for the two complexes.

In the case of CH3Br···NCH the aug-cc-pVTZ basis set [S5] was used in the all-electron SAPT/SAPT(DFT) calculations. This basis set was assigned to all atoms in the complex. Analogous ECP-based calculations were performed using the aug-cc-pVTZ basis set for H, C, and N and the aug-cc-pVTZ-PP basis set [S6,S7] for Br. The bases employed in both the all-electron and ECP-based approaches were extended with the 3*s*3*p*2*d*2*f* set of midbond (mb) functions centered at the midpoint of the Br···N contact in the CH3Br···NCH complex.

In the present paper the CH3I···NCH complex was studied by SAPT/def2-QZVPP+mb and SAPT(DFT)/def2-QZVPP+mb. Here, the corresponding all-electron SAPT/SAPT(DFT) calculations are performed through changing the I-atom def2-QZVPP basis set into the TZVPPall basis set [S8]. At the same time, the def2-QZVPP basis set of H, C, N, and the mb functions remain unchanged.

Results of the test calculations are presented in Supplementary Tables 2 and 3. From the comparison of ECP-based results with the corresponding all-electron results it is clear that the accuracy of both ECP-based individual interaction energy correction terms and their collective contributions varies significantly. For the majority of SAPT and SAPT(DFT) terms and their collective contributions in CH3Br···NCH, the differences between the ECP-based approach and the all-electron approach are quite small (the relative differences most often amount to merely several percent). However, the difference between the ECP-based approach and the all-electron approach becomes significant for all induction and exchange-induction energy correction terms and the collective induction contribution . The collective induction contributions exhibit smaller values of the difference and the percentage relative difference than their individual constituent energy correction terms. This is so because the differences for each pair of induction and exchange-induction terms have opposite signs, and therefore, they tend to cancel each other out to a certain extent. Such a cancellation becomes particularly evident for two collective induction contributions and . The poor performance of the ECP-based approach for predicting the induction contributions (especially of the third order) was previously reported by Patkowski and Szalewicz [S9]. Regarding the ECP-based *E*int values, the largest difference in these values relative to the all-electron *E*int values is detected for SAPT(DFT). The sign and magnitude of this difference are determined mostly by the difference in . For *E*int obtained from five ECP-based regular SAPT methods such differences are much smaller. Interestingly, the effect of ECP on *E*int obtained from the regular SAPT methods turns out to be smaller than that observed for CCSD(T).

In the case of CH3I···NCH, the differences between the ECP-based and all-electron SAPT/SAPT(DFT) energy correction terms and their collective contributions essentially behave like in CH3Br···NCH. In particular, the collective induction contribution in CH3I···NCH is very poorly recovered by the ECP-based SAPT approach. The differences for the energy correction terms and their collective contributions in CH3I···NCH are generally larger than those found for CH3Br···NCH. The same is observed for the differences in SAPT/SAPT(DFT) *E*int. There are at least two reasons for the enlargement of these differences. First, the qualities of the I-atom TZVPPall and def2-QZVPP basis sets differ to a greater extent than the qualities of the aug-cc-pVTZ and aug-cc-pVTZ-PP basis sets for bromine. Second, relativistic effects play a more significant role in iodine than in bromine. The all-electron SAPT/SAPT(DFT) calculations for CH3I···NCH completely neglect such effects (in contrast to the ECP-based approach that implicitly covers some relativistic effects).

Although some of the SAPT/SAPT(DFT) interaction energy correction terms are not reliably recovered by the ECP-based approach, the differences between the SAPT/SAPT(DFT) *E*int values obtained from the all-electron and ECP-based approaches usually do not differ very much from the difference yielded by these approaches combined with CCSD(T). Based on the comparison of such differences for SAPT/SAPT(DFT) versus CCSD(T) it can be concluded that the ECP-based regular SAPT and SAPT(DFT) approaches may provide a sensible approximation to the all-electron SAPT/SAPT(DFT) interaction energies. One cannot expect that the SAPT/SAPT(DFT) ECP-based and all-electron approaches should always lead to exactly the same results because several discrepancies may be inherent in these approaches (and in fact they occurred in the test calculations for CH3Br···NCH and CH3I···NCH). In general, such discrepancies may result from, for example, different basis sets applicable to these approaches, the quality of ECPs, the inclusion/omission of relativistic effects, the possibility of freezing some core electrons, the inclusion/omission of core-valence correlation effects etc.

**Supplementary Table 2.** Comparison of various SAPT/SAPT(DFT) interaction energy correction terms calculated using all-electron and ECP basis sets for the CH3Br···NCH complex. Interaction energies obtained from various SAPT/SAPT(DFT) methods and the CCSD(T) method are also listed. All energies and their differences are given in kcal/mol

| SAPT/SAPT(DFT) terms or *E*int | Basis set | | Differencea | Relative difference(%)b |
| --- | --- | --- | --- | --- |
| all-electron | ECP |
|  | -0.4217 | -0.4438 | -0.0221 | 5 |
|  | 1.9082 | 1.8068 | -0.1014 | 5 |
|  | -1.1480 | -0.7733 | 0.3747 | 33 |
|  | 0.8414 | 0.4778 | -0.3636 | 43 |
|  | -0.3066 | -0.2955 | 0.0111 | 4 |
|  | -5.4782 | -1.3857 | 4.0924 | 75 |
|  | 5.4353 | 1.3692 | -4.0661 | 75 |
|  | -0.0429 | -0.0166 | 0.0264 | 61 |
|  | -0.3557 | -0.3401 | 0.0156 | 4 |
|  | 0.0972 | 0.0880 | -0.0092 | 9 |
|  | -0.2585 | -0.2521 | 0.0064 | 2 |
|  | 0.0361 | 0.0379 | 0.0018 | 5 |
|  | 0.1937 | 0.1802 | -0.0135 | 7 |
|  | 0.2299 | 0.2181 | -0.0118 | 5 |
|  | 0.2613 | 0.2456 | -0.0158 | 6 |
|  | -0.2198 | -0.1030 | 0.1168 | 53 |
|  | 0.1611 | 0.0637 | -0.0975 | 60 |
|  | -0.0587 | -0.0394 | 0.0194 | 33 |
|  | -2.0749 | -2.0510 | 0.0239 | 1 |
|  | 0.4999 | 0.5001 | 0.0002 | 0 |
|  | -0.4912 | -0.4910 | 0.0002 | 0 |
|  | 0.2209 | 0.2148 | -0.0060 | 3 |
|  | -1.8453 | -1.8270 | 0.0183 | 1 |
|  | 0.0720 | 0.0708 | -0.0012 | 2 |
|  | -0.0354 | -0.0346 | 0.0007 | 2 |
|  | 0.0367 | 0.0362 | -0.0005 | 1 |
|  | -0.1650 | -0.1419 | 0.0231 | 14 |
|  | 0.1799 | 0.1565 | -0.0235 | 13 |
|  | 0.0149 | 0.0146 | -0.0003 | 2 |
|  | -0.1609 | -0.1682 | -0.0073 | 5 |
|  | -0.1180 | -0.1517 | -0.0337 | 29 |
|  | -0.6082 | -0.6790 | -0.0708 | 12 |
|  | 2.0332 | 1.9210 | -0.1121 | 6 |
|  | -1.3205 | -0.8613 | 0.4592 | 35 |
|  | 1.0369 | 0.5871 | -0.4498 | 43 |
|  | -0.2836 | -0.2743 | 0.0094 | 3 |
|  | -1.8927 | -1.8746 | 0.0181 | 1 |
|  | 0.2574 | 0.2509 | -0.0065 | 3 |
|  | -1.6353 | -1.6237 | 0.0116 | 1 |
|  | -0.6741 | -0.7686 | -0.0945 | 14 |
|  | -0.8586 | -0.9300 | -0.0713 | 8 |
|  | -0.8184 | -0.8934 | -0.0749 | 9 |
|  | -0.6492 | -0.7345 | -0.0853 | 13 |
|  | -0.7125 | -0.7711 | -0.0586 | 8 |
|  | -0.4940 | -0.6559 | -0.1619 | 33 |
|  | -0.6259 | -0.7391 | -0.1133 | 18 |

a Subtraction of a SAPT/all-electron term from the corresponding term calculated using the ECP basis set

b The difference between SAPT/ECP and SAPT/all-electron terms divided by this SAPT/all-electron term. This quantity is expressed in percent

**Supplementary Table 3.** Comparison of various SAPT/SAPT(DFT) interaction energy correction terms calculated using all-electron and ECP basis sets for the CH3I···NCH complex. Interaction energies obtained from various SAPT/SAPT(DFT) methods and the CCSD(T) method are also listed. All energies and their differences are given in kcal/mol

| SAPT/SAPT(DFT) terms or *E*int | Basis set | | Differencea | Relative difference(%)b |
| --- | --- | --- | --- | --- |
| all-electron | ECP |
|  | -2.1603 | -2.1256 | 0.0347 | 2 |
|  | 4.3253 | 3.8364 | -0.4889 | 11 |
|  | -0.5982 | -0.5564 | 0.0418 | 7 |
|  | -0.3057 | 0.0099 | 0.3156 | 103 |
|  | -0.1596 | -0.1548 | 0.0048 | 3 |
|  | 0.4337 | 0.2789 | -0.1548 | 36 |
|  | 0.5082 | 0.3369 | -0.1713 | 34 |
|  | -0.1109 | -0.0463 | 0.0646 | 58 |
|  | -2.8515 | -2.8432 | 0.0083 | >1 |
|  | 0.0628 | 0.0604 | -0.0024 | 4 |
|  | -0.0058 | -0.0088 | -0.0030 | 51 |
|  | -0.4060 | -0.4198 | -0.0138 | 3 |
|  | -0.1003 | -0.4297 | -0.3294 | 328 |
|  | -2.2247 | -2.2281 | -0.0034 | >1 |
|  | 4.5262 | 3.9717 | -0.5544 | 12 |
|  | -0.5566 | -0.5154 | 0.0413 | 7 |
|  | -2.5081 | -2.4534 | 0.0546 | 2 |
|  | -1.3275 | -1.7471 | -0.4196 | 32 |
|  | -1.3487 | -1.7645 | -0.4159 | 31 |
|  | -1.2314 | -1.6482 | -0.4168 | 34 |
|  | -0.9100 | -1.4213 | -0.5113 | 56 |
|  | -1.2957 | -1.4915 | -0.1958 | 15 |
|  | -0.7632 | -1.2252 | -0.4620 | 61 |
|  | -0.9359c | -1.4207 | -0.4848 | 52 |

a Subtraction of a SAPT/all-electron term from the corresponding term calculated using the ECP basis set

b The difference between SAPT/ECP and SAPT/all-electron terms divided by this SAPT/all-electron term. This quantity is expressed in percent

c Calculated without the resolution-of-the-identity approximation and with the frozen core approximation in the Gaussian 09 D.01 program [S10].

**Supplementary Section 3**. Calculations of the CCSD(T) interaction energy extrapolated to the CBS limit

The coupled-cluster method incorporating single, double and perturbative triple excitations (CCSD(T)), together with an extrapolation to the complete basis set (CBS) limit, is capable of delivering very accurate interaction energies for various molecular complexes [S11]. Thus, the CCSD(T)/CBS level of theory is used in this work to provide the most accurate estimation of the interaction energy (*E*int) between MH3X and HCN in the MH3X···NCH complexes. A two-point extrapolation procedure is employed to obtain the total energies of the MH3X···NCH complexes and the separated MH3X and HCN molecules in the geometries taken from the complexes. The extrapolation to is achieved by using the following formula [S12–S14]

(S1)

where Y indicates the cardinal number of the largest basis set employed (Y = 4 in our case). The coefficients *α* and *β* are equal to 7.88 and 2.97, respectively [S15]. In Eq. S1 the total Hartree-Fock energies () and the CCSD(T) correlation energies () are calculated using a pair of ‘def2’ basis sets developed by Ahlrichs and coworkers [S16]. def2-TZVPP and def2-QZVPP are basis sets of heavily polarized triple-ζ and heavily polarized quadruple-ζ qualities, respectively. These basis sets have been extended with a set of 3*s*3*p*2*d*2*f* midbond functions (their exponents and position are given in the main text of this work). The energies of the separated MH3X and HCN molecules are calculated within the dimer-centered plus basis set (DC+BS) approach. In the final step, the *E*int energies at the CCSD(T)/CBS level of theory are determined using the extrapolated total energies .

(S2)

Because the ‘def2’ basis sets are not widely applied to the CBS extrapolation of *E*int, the accuracy of our CCSD(T)/CBS(def2-XZVPP+mb) *E*int values is verified by comparing with the corresponding CCSD(T)/CBS(aug-cc-pVXZ(-PP)+mb) results. The latter *E*int values have been calculated using Eq. S1 in which the HF/aug-cc-pVTZ(-PP)+mb and HF/aug-cc-pVQZ(-PP)+mb total energies and the CCSD(T)/aug-cc-pVTZ(-PP)+mb and CCSD(T)/aug-cc-pVQZ(-PP)+mb correlation energies are inserted. The set of 3*s*3*p*2*d*2*f* midbond functions is the same as that used in CBS(def2-XZVPP+mb). The coefficients *α* and *β* amount to 5.79 and 3.05, respectively [S15].

Results of the comparison are presented in Supplementary Table 4. It can be seen in this table that the CCSD(T)/def2-QZVPP+mb *E*int energies are underestimated by 0.05 kcal/mol on average, if compared with the CCSD(T)/CBS(def2-XZVPP+mb) results. The CCSD(T)/CBS(def2-XZVPP+mb) *E*int energies are practically equal to those yielded by CCSD(T)/CBS(aug-cc-pVXZ(-PP)+mb). To be precise, the former are overestimated by 0.02 kcal/mol on average.

To conclude, the aforementioned results provide firm evidence that CCSD(T) in combination with the def2-QZVPP+mb basis set produces *E*int energies that are very close to the CBS limit. Furthermore, the ‘def2’ basis sets extended with midbond functions can be used for the reliable CBS extrapolation of *E*int in the MH3X···NCH complexes.

**Supplementary Table 4.** Errors (MSE, rRMSE(%); in kcal/mol and %) in *E*int calculated using the CCSD(T) method combined with various basis sets for 10 MH3X···NCH complexes. The errors are calculated relative to the CCSD(T)/CBS(def2-XZVPP+mb) and CCSD(T)/CBS(aug-cc-pVXZ(-PP)+mb) results. The values of rRMSE(%) are shown in parentheses

| Basis set/CBS scheme | CBS limit | | |
| --- | --- | --- | --- |
| CBS(def2-XZVPP+mb) | CBS(aug-cc-pVXZ(-PP)+mb) | |
| def2-QZVPP | 0.28  (24) | | 0.26  (23) |
| def2-QZVPP+mb | 0.05  (5) | | 0.03  (4) |
| CBS(def2-XZVPP) | 0.06  (6) | | 0.05  (5) |
| CBS(def2-XZVPP+mb) | - | | -0.02  (2) |

**Supplementary Section 4**. Calculations of the electronegativity of the MH3 groups

The group electronegativity for MH3 (where M = C–Pb) is calculated using CCSD(T) in conjunction with the def2-QZVPP basis set. A single H atom is removed from the MH4 molecules in their MP2/def2-QZVPP-optimized geometries, and the resulting MH3 groups show the same bond lengths and angles as in the neutral MH4 molecules (that is, the geometries of MH3 are not optimized). The single-point CCSD(T)/def2-QZVPP energies of those groups in the form of a radical, a cation and an anion are used to calculate the vertical ionization energy (*IE*) and electron affinity (*EA*) of the MH3 groups. Next, the group electronegativity (*χ*) is evaluated by means of the following formula

. (S3)

The values of *χ* calculated for the MH3 groups are listed in Supplementary Table 5.

**Supplementary Table 5**. Electronegativity (*χ*; in eV) calculated for the MH3 groups

| Group | *χ* |
| --- | --- |
| CH3 | 5.33 |
| SiH3 | 4.83 |
| GeH3 | 4.73 |
| SnH3 | 4.57 |
| PbH3 | 4.38 |

**Supplementary Section 5**. Grouping SAPT(DFT) energy correction terms into four principal components

SAPT is able to provide an important insight into the nature of weak intermolecular interactions because it yields interaction energies as a sum of well-defined and physically meaningful energy correction terms (that is, the SAPT interaction energy is in the form of perturbation expansion). Within the framework of the SAPT(DFT) method, *E*int is expressed as a sum of several energy terms (see Eq. 1) that can be grouped into four principal components with clear physical meanings. The components covering electrostatics (*E*elst), exchange (*E*exch), induction (*E*ind) and dispersion (*E*disp) are assumed to include the following energy terms occurring in the SAPT(DFT) expansion of *E*int:

(S4)

(S5)

(S6)

(S7)

**Supplementary Section 6**. Additional tables with results

**Supplementary Table 6. SAPT interaction energy correction terms for 10 MH3X···NCH complexes. All values in kcal/mol**

| SAPT term | MH3X···NCH complex | | | | | | | | | |
| --- | --- | --- | --- | --- | --- | --- | --- | --- | --- | --- |
| X = I | | | | | X = At | | | | |
| M = C | M = Si | M = Ge | M = Sn | M = Pb | M = C | M = Si | M = Ge | M = Sn | M = Pb |
|  | -2.1256 | -1.2410 | -1.1580 | -0.8091 | -0.4828 | -3.8391 | -2.3974 | -2.4936 | -2.1630 | -2.0272 |
|  | 3.8364 | 2.4607 | 2.7122 | 2.5059 | 2.4930 | 5.8211 | 3.7778 | 4.2790 | 4.1068 | 4.3513 |
|  | -1.6651 | -0.9969 | -1.1072 | -1.0268 | -1.0527 | -2.9025 | -1.7020 | -1.9526 | -1.8605 | -2.0179 |
|  | 1.1087 | 0.6154 | 0.7006 | 0.6404 | 0.6537 | 2.0295 | 1.1389 | 1.3392 | 1.2771 | 1.4013 |
|  | -3.1775 | -1.7475 | -1.9984 | -1.8317 | -1.8832 | -5.9366 | -3.2956 | -3.8944 | -3.7222 | -4.1172 |
|  | 3.1874 | 1.7523 | 2.0051 | 1.8425 | 1.8999 | 6.4146 | 3.5061 | 4.1368 | 3.9396 | 4.3457 |
|  | -0.2500 | -0.1796 | -0.2117 | -0.2427 | -0.2812 | -0.3916 | -0.2736 | -0.3233 | -0.3547 | -0.3926 |
|  | 0.0952 | 0.0515 | 0.0691 | 0.0875 | 0.0986 | 0.1874 | 0.1043 | 0.1401 | 0.1664 | 0.1900 |
|  | 0.1436 | 0.0714 | 0.0805 | 0.0681 | 0.0674 | 0.2822 | 0.1564 | 0.1805 | 0.1664 | 0.1803 |
|  | 0.1353 | 0.0618 | 0.0488 | 0.0260 | 0.0245 | 0.1708 | 0.0826 | 0.0594 | 0.0219 | 0.0200 |
|  | 0.3369 | 0.1714 | 0.1572 | 0.1154 | 0.0919 | 0.5255 | 0.2942 | 0.2793 | 0.2217 | 0.2292 |
|  | -0.1386 | -0.0567 | -0.0571 | -0.0404 | -0.0322 | -0.3033 | -0.1431 | -0.1531 | -0.1267 | -0.1245 |
|  | 0.0923 | 0.0350 | 0.0361 | 0.0252 | 0.0200 | 0.2121 | 0.0957 | 0.1050 | 0.0869 | 0.0864 |
|  | -3.3389 | -2.4902 | -2.6540 | -2.5337 | -2.5664 | -4.5070 | -3.3724 | -3.6501 | -3.5528 | -3.7255 |
|  | 1.0153 | 0.7828 | 0.8303 | 0.7951 | 0.8160 | 1.5221 | 1.1656 | 1.2549 | 1.2225 | 1.2926 |
|  | -0.9570 | -0.7319 | -0.7688 | -0.7307 | -0.7459 | -1.4963 | -1.1411 | -1.2144 | -1.1729 | -1.2322 |
|  | 0.4374 | 0.2978 | 0.3298 | 0.3133 | 0.3212 | 0.6558 | 0.4550 | 0.5134 | 0.5031 | 0.5422 |
|  | 0.1317 | 0.0912 | 0.0987 | 0.0930 | 0.0940 | 0.1845 | 0.1304 | 0.1436 | 0.1391 | 0.1470 |
|  | -0.0714 | -0.0475 | -0.0523 | -0.0492 | -0.0502 | -0.1066 | -0.0725 | -0.0814 | -0.0790 | -0.0847 |
|  | -0.4169 | -0.2314 | -0.2650 | -0.2413 | -0.2460 | -0.7603 | -0.4371 | -0.5164 | -0.4958 | -0.5476 |
|  | 0.4081 | 0.2505 | 0.2857 | 0.2691 | 0.2798 | 0.7145 | 0.4446 | 0.5208 | 0.5099 | 0.5655 |

**Supplementary Table 7. SAPT(DFT) interaction energy correction terms for 10 MH3X···NCH complexes. All values in kcal/mol**

| SAPT(DFT) term | MH3X···NCH complex | | | | | | | | | |
| --- | --- | --- | --- | --- | --- | --- | --- | --- | --- | --- |
| X = I | | | | | X = At | | | | |
| M = C | M = Si | M = Ge | M = Sn | M = Pb | M = C | M = Si | M = Ge | M = Sn | M = Pb |
|  | -2.2281 | -1.4092 | -1.3363 | -1.0165 | -0.7276 | -3.9460 | -2.5829 | -2.6838 | -2.3738 | -2.2523 |
|  | 3.9717 | 2.5107 | 2.7308 | 2.5008 | 2.4725 | 5.9555 | 3.8257 | 4.2786 | 4.0762 | 4.3012 |
|  | -1.8229 | -1.0685 | -1.1804 | -1.0799 | -1.0888 | -3.2166 | -1.8649 | -2.1200 | -1.9985 | -2.1427 |
|  | 1.3075 | 0.7139 | 0.7976 | 0.7173 | 0.7201 | 2.3771 | 1.3151 | 1.5223 | 1.4316 | 1.5521 |
|  | -2.9299 | -2.1522 | -2.3074 | -2.1967 | -2.2089 | -3.8811 | -2.8946 | -3.1209 | -3.0304 | -3.1580 |
|  | 0.4765 | 0.3239 | 0.3547 | 0.3348 | 0.3393 | 0.6876 | 0.4806 | 0.5331 | 0.5191 | 0.5528 |

**Supplementary Table 8**. Interaction energy between MH3X and HCN in MH3X···NCH calculated using SAPT0, SAPT2, SAPT2+, SAPT2+(3), SAPT2+3 and SAPT(DFT). The values of the HF corrections are also listed. All values in kcal/mol

| Complex | SAPT0 | SAPT2 | SAPT2+ | SAPT2+(3) | SAPT2+3 | SAPT(DFT) |  |  |
| --- | --- | --- | --- | --- | --- | --- | --- | --- |
| CH3I···NCH | -1.75 | -1.76 | -1.65 | -1.42 | -1.49 | -1.23 | -0.42 | -0.43 |
| SiH3I···NCH | -1.35 | -1.42 | -1.33 | -1.19 | -1.21 | -1.08 | -0.23 | -0.23 |
| GeH3I···NCH | -1.18 | -1.28 | -1.19 | -1.02 | -1.05 | -0.94 | -0.26 | -0.26 |
| SnH3I···NCH | -0.91 | -1.07 | -0.99 | -0.81 | -0.82 | -0.74 | -0.23 | -0.25 |
| PbH3I···NCH | -0.63 | -0.84 | -0.77 | -0.57 | -0.57 | -0.49 | -0.24 | -0.26 |
| CH3At···NCH | -2.74 | -2.77 | -2.67 | -2.30 | -1.98 | -2.02 | -0.67 | -1.15 |
| SiH3At···NCH | -2.10 | -2.18 | -2.10 | -1.87 | -1.72 | -1.72 | -0.38 | -0.59 |
| GeH3At···NCH | -1.96 | -2.10 | -2.02 | -1.73 | -1.57 | -1.59 | -0.44 | -0.68 |
| SnH3At···NCH | -1.69 | -1.90 | -1.81 | -1.51 | -1.35 | -1.38 | -0.43 | -0.64 |
| PbH3At···NCH | -1.48 | -1.71 | -1.62 | -1.28 | -1.12 | -1.15 | -0.48 | -0.70 |

**Supplementary Table 9**. Interaction energy between MH3X and HCN in MH3X···NCH calculated using HF, MP2, SCS-MP2, SCS(MI)-MP2, MP2C, MP2.5, MP3, MP4(SDQ), MP4 and CCSD. All values in kcal/mol

| Complex | HF | MP2 | SCS-MP2 | SCS(MI)-MP2 | MP2C | MP2.5 | MP3 | MP4(SDQ) | MP4 | CCSD |
| --- | --- | --- | --- | --- | --- | --- | --- | --- | --- | --- |
| CH3I···NCH | 0.73 | -1.83 | -1.30 | -1.44 | -1.42 | -1.40 | -0.97 | -1.21 | -1.72 | -1.07 |
| SiH3I···NCH | 0.61 | -1.41 | -0.98 | -1.12 | -1.07 | -1.06 | -0.71 | -0.91 | -1.35 | -0.80 |
| GeH3I···NCH | 0.89 | -1.31 | -0.85 | -0.99 | -0.96 | -0.92 | -0.53 | -0.75 | -1.24 | -0.64 |
| SnH3I···NCH | 1.08 | -1.10 | -0.65 | -0.79 | -0.77 | -0.71 | -0.32 | -0.52 | -1.01 | -0.42 |
| PbH3I···NCH | 1.37 | -0.88 | -0.41 | -0.55 | -0.52 | -0.47 | -0.06 | -0.26 | -0.78 | -0.16 |
| CH3At···NCH | 0.44 | -2.77 | -2.09 | -2.28 | -2.14 | -2.14 | -1.51 | -1.95 | -2.58 | -1.71 |
| SiH3At···NCH | 0.44 | -2.22 | -1.66 | -1.82 | -1.74 | -1.71 | -1.20 | -1.59 | -2.14 | -1.38 |
| GeH3At···NCH | 0.73 | -2.21 | -1.60 | -1.78 | -1.68 | -1.64 | -1.07 | -1.49 | -2.11 | -1.27 |
| SnH3At···NCH | 0.94 | -2.02 | -1.40 | -1.59 | -1.50 | -1.43 | -0.84 | -1.25 | -1.88 | -1.04 |
| PbH3At···NCH | 1.23 | -1.88 | -1.23 | -1.43 | -1.31 | -1.25 | -0.62 | -1.04 | -1.71 | -0.82 |

**References**

[S1] M. Grüning, O. V. Gritsenko, S. J. A. van Gisbergen, and E. J. Baerends, “Shape corrections to exchange-correlation potentials by gradient-regulated seamless connection of model potentials for inner and outer region,” *The Journal of Chemical Physics*, vol. 114, pp. 652–660, 2001.

[S2] C. Utsunomiya, T. Kobayashi, and S. Nagakura, “Photoelectron angular distribution measurements for some aliphatic alcohols, amines, halides,” *Bulletin of the Chemical Society of Japan*, vol. 53, pp. 1216–1220, 1980.

[S3] S. Cradock and R. A. Whiteford, “Photo-electron spectra of the mono and dihalo silanes and germanes,” *Journal of the Chemical Society, Faraday Transactions*, vol. 67, pp. 3425–3434, 1971.

[S4] J. Kreile, A. Schweig, and W. Thiel, “Experimental and theoretical investigation of the photoionization of hydrogen cyanide,” *Chemical Physics Letters*, vol. 87, pp. 473–476, 1982.

[S5] T. H. Dunning Jr, “Gaussian basis sets for use in correlated molecular calculations. I. The atoms boron through neon and hydrogen,” *The Journal of Chemical Physics*, vol. 90, pp. 1007–1023, 1989.

[S6] K. A. Peterson, “Systematically convergent basis sets with relativistic pseudopotentials. I. Correlation consistent basis sets for the post-d group 13–15 elements,” *The Journal of Chemical Physics*, vol. 119, pp. 11099–11112, 2003.

[S7] B. Metz, H. Stoll, and M. Dolg, “Small-core multiconfiguration-Dirac–Hartree–Fock-adjusted pseudopotentials for post-d main group elements: application to PbH and PbO,” *The Journal of Chemical Physics*, vol. 113, pp. 2563–2569, 2000.

[S8] A. Schäfer, C. Huber, and R. Ahlrichs, “Fully optimized contracted Gaussian basis sets of triple zeta valence quality for atoms Li to Kr,” *The Journal of Chemical Physics*, vol. 100, pp. 5829–5835, 1994.

[S9] K. Patkowski and K. Szalewicz, “Frozen core and effective core potentials in symmetry-adapted perturbation theory,” *The Journal of Chemical Physics*, vol. 127, pp. 164103/1–17, 2007.

[S10] M. J. Frisch, G. W. Trucks, H. B. Schlegel et al., *Gaussian 09 D.01*, Gaussian, Inc., Wallingford, CT, 2013.

[S11] K. E. Riley, M. Pitoňák, P. Jurečka, and P. Hobza, “Stabilization and structure calculations for noncovalent interactions in extended molecular systems based on wave function and density functional theories,” *Chemical Reviews*, vol. 110, pp. 5023–5063, 2010.

[S12] A. Karton and J. M. L. Martin, “Comment on: “Estimating the Hartree–Fock limit from finite basis set calculations” [Jensen F (2005) Theor Chem Acc 113:267],” *Theoretical Chemistry Accounts*, vol. 115, pp. 330–333, 2006.

[S13] A. Halkier, T. Helgaker, P. Jørgensen, W. Klopper, H. Koch, J. Olsen, and A. K. Wilson, “Basis-set convergence in correlated calculations on Ne, N2, and H2O,” *Chemical Physics Letters*, vol. 286, pp. 243–252, 1998.

[S14] D. G. Truhlar, “Basis-set extrapolation,” *Chemical Physics Letters*, vol. 294, pp. 45–48, 1998.

[S15] F. Neese and E. F. Valeev, “Revisiting the atomic natural orbital approach for basis sets: Robust systematic basis sets for explicitly correlated and conventional correlated ab initio methods?,” *Journal of Chemical Theory and Computation*, vol. 7, pp. 33–43, 2011.

[S16] F. Weigend and R. Ahlrichs, “Balanced basis sets of split valence, triple zeta valence and quadruple zeta valence quality for H to Rn: design and assessment of accuracy,” *Physical Chemistry Chemical Physics*, vol. 7, pp. 3297–3305, 2005.
